# Supplementary material for: Mycobacterium bovis Strain Ravenel Is Attenuated in Cattle
Source: MDPI journal article supplement (doi:10.3390/pathogens11111330), 2022-11-11
Supplement: s1 [file pathogens-1899478-supplementary.xlsx]

## Sheet: S1-Rav-Uni-Mis-Fun-Cor-32SNPs
S1-Ravenel(Rav)-Unique(Uni)-Missense(Mis)-Putative Function Associated(Fun)-Present In Correctly Assembled Region Of Genome(Cor)-32SNPs
CHR	POS	GENE	Gene Identifier	RavenelSNPoutput	REF-AF2122-97	Cattle-10-7428	Deer-95-1315	EVIDENCE (Frequency count of Ravenel vs Af2122)	FTYPE	STRAND	NT_POS	AA_POS	EFFECT	PRODUCT
LT708304	495707	ackA	MB0417	G	T	T	T	G:444 T:1	CDS	+	838/1158	280/385	missense_variant c.838T>G p.Ser280Ala	PROBABLE ACETATE KINASE ACKA (ACETOKINASE)
LT708304	4208072	aftb	MB3835C	A	G	G	G	A:433 G:1	CDS	-	1450/1884	484/627	missense_variant c.1450C>T p.His484Tyr	possible arabinofuranosyltransferase aftb
LT708304	281599	aftd	MB0241C	T	C	C	C	T:479 C:0	CDS	-	3577/4203	1193/1400	missense_variant c.3577G>A p.Glu1193Lys	possible arabinofuranosyltransferase aftd
LT708304	1855428	argC	MB1680	C	T	T	T	C:433 T:0	CDS	+	58/1059	20/352	missense_variant c.58T>C p.Tyr20His	probable n-acetyl-gamma-glutamyl-phoshate reductase argc
LT708304	2781050	bkdc	MB2523C	G	T	T	T	G:404 T:1	CDS	-	98/1182	33/393	missense_variant c.98A>C p.Asp33Ala	probable branched-chain keto acid dehydrogenase e2 component bkdc
LT708304	2015643	eccc5	MB1812	T	C	C	C	T:380 C:0	CDS	+	1520/4176	507/1391	missense_variant c.1520C>T p.Thr507Met	esx conserved component eccc5. esx-5 type vii secretion system protein.
LT708304	4283808	esph	MB3897	A	G	G	G	A:463 G:0	CDS	+	307/552	103/183	missense_variant c.307G>A p.Ala103Thr	esx-1 secretion-associated protein esph
LT708304	3262864	fadD29	MB2974C	C	T	T	T	C:372 T:1	CDS	-	692/1860	231/619	missense_variant c.692A>G p.Asn231Ser	fatty-acid-amp ligase fadd29 (fatty-acid-amp synthetase) (fatty-acid-amp synthase)
LT708304	486587	fadD30	MB0411	C	G	G	G	C:344 G:1	CDS	+	1593/1758	531/585	missense_variant c.1593G>C p.Arg531Ser	fatty-acid-amp ligase fadd30 (fatty-acid-amp synthetase) (fatty-acid-amp synthase)
LT708304	3431412	ftsX	MB3128C	A	G	G	G	A:381 G:0	CDS	-	227/894	76/297	missense_variant c.227C>T p.Thr76Ile	PUTATIVE CELL DIVISION PROTEIN FTSX (SEPTATION COMPONENT-TRANSPORT INTEGRAL MEMBRANE PROTEIN ABC TRANSPORTER)
LT708304	2855958	glnQ	MB2593	C	A	A	A	C:406 A:3	CDS	+	755/993	252/330	missense_variant c.755A>C p.Glu252Ala	PROBABLE GLUTAMINE-TRANSPORT ATP-BINDING PROTEIN ABC TRANSPORTER GLNQ
LT708304	1001077	gltA2	MB0920	G	A	A	A	G:288 A:0	CDS	+	1141/1296	381/431	missense_variant c.1141A>G p.Arg381Gly	PROBABLE CITRATE SYNTHASE I GLTA2
LT708304	94414	hycQ	MB0089	G	T	T	T	G:477 T:0	CDS	+	429/1467	143/488	missense_variant c.429T>G p.Phe143Leu	POSSIBLE HYDROGENASE HYCQ
LT708304	411205	iniB	MB0348	A	G	G	G	A:418 G:1	CDS	+	814/1440	272/479	missense_variant c.814G>A p.Ala272Thr	ISONIAZID INDUCTIBLE GENE PROTEIN INIB
LT708304	4325973	LH57_21250	MB3932C	A	G	G	G	A:426 G:1	CDS	-	296/531	99/176	missense_variant c.296C>T p.Ala99Val	necrotizing toxin (TNT)
LT708304	3286516	lipN	MB2994C	C	A	A	A	CTC:335 ATA:0	CDS	-	289/1131	96/376	missense_variant c.287_289delTATinsGAG p.IleCys96ArgGly	PROBABLE LIPASE/ESTERASE LIPN
LT708304	4229553	mmpL8	MB3853C	T	C	C	C	T:363 C:0	CDS	-	2662/3270	888/1089	missense_variant c.2662G>A p.Val888Ile	conserved integral membrane transport protein mmpl8
LT708304	576626	msha	MB0496	A	G	G	G	A:470 G:0	CDS	+	316/1443	106/480	missense_variant c.316G>A p.Gly106Arg	glycosyltransferase msha
LT708304	4305161	mycp1	MB3913C	A	G	G	G	A:432 G:0	CDS	-	374/1341	125/446	missense_variant c.374C>T p.Thr125Ile	membrane-anchored mycosin mycp1 (serine protease) (subtilisin-like protease) (subtilase-like) (mycosin-1)
LT708304	3471351	nuoA	MB3169	T	C	C	C	T:387 C:0	CDS	+	149/387	50/128	missense_variant c.149C>T p.Thr50Ile	PROBABLE NADH DEHYDROGENASE I (CHAIN A) NUOA (NADH-UBIQUINONE OXIDOREDUCTASE CHAIN A)
LT708304	3039622	PE27	MB2791C	G	A	A	A	G:395 A:2	CDS	-	350/828	117/275	missense_variant c.350T>C p.Val117Ala	pe family protein pe27
LT708304	3050770	pepR	MB2805C	T	G	G	G	T:370 G:1	CDS	-	553/1317	185/438	missense_variant c.553C>A p.Gln185Lys	PROBABLE ZINC PROTEASE PEPR
LT708304	4252443	pheA	MB3868C	T	C	C	C	T:519 C:1	CDS	-	913/966	305/321	missense_variant c.913G>A p.Gly305Ser	prephenate dehydratase phea
LT708304	3184227	pknI	MB2938C	A	G	G	G	A:384 G:0	CDS	-	226/1758	76/585	missense_variant c.226C>T p.His76Tyr	PROBABLE TRANSMEMBRANE SERINE/THREONINE-PROTEIN KINASE I PKNI (PROTEIN KINASE I) (STPK I) (PHOSPHORYLASE B KINASE KINASE) (HYDROXYALKYL-PROTEIN KINASE)
LT708304	1715469	pks5	MB1554C	T	C	C	C	T:407 C:1	CDS	-	1363/6327	455/2108	missense_variant c.1363G>A p.Gly455Ser	Probable polyketide synthase pks5
LT708304	374499	PPE6	MB0313C	T	C	C	C	T:320 C:2	CDS	-	2243/5958	748/1985	missense_variant c.2243G>A p.Gly748Asp	ppe family protein ppe6
LT708304	2298964	ppm1	MB2077C	G	A	A	A	G:369 A:0	CDS	-	116/2625	39/874	missense_variant c.116T>C p.Phe39Ser	Polyprenol-monophosphomannose synthase Ppm1
LT708304	3617146	purE	MB3303C	T	A	A	A	T:456 A:0	CDS	-	491/525	164/174	missense_variant c.491T>A p.Leu164Gln	PROBABLE PHOSPHORIBOSYLAMINOIMIDAZOLE CARBOXYLASE CATALYTIC SUBUNIT PURE (AIR CARBOXYLASE) (AIRC)
LT708304	1129357	rpfB	MB1036	G	A	A	A	G:403 A:0	CDS	+	788/1089	263/362	missense_variant c.788A>G p.Glu263Gly	Probable resuscitation-promoting factor rpfB
LT708304	3034671	thyA	MB2786C	T	C	C	C	T:379 C:1	CDS	-	787/792	263/263	missense_variant c.787G>A p.Val263Ile	PROBABLE THYMIDYLATE SYNTHASE THYA (TS) (TSASE)
LT708304	1757882	treYb	MB1589C	T	C	C	C	T:428 C:1	CDS	-	569/735	190/244	missense_variant c.569G>A p.Arg190His	Maltooligosyltrehalose synthase TreYb [SECOND PART]
LT708304	1296927	typA	MB1197	G	A	A	A	G:407 A:1	CDS	+	1360/1887	454/628	missense_variant c.1360A>G p.Thr454Ala	POSSIBLE GTP-BINDING TRANSLATION ELONGATION FACTOR TYPA (TYROSINE PHOSPHORYLATED PROTEIN A) (GTP-BINDING PROTEIN)

## Sheet: S2-Rav-Uni-Mis-Fun-Cor-9SNPs
S2-Ravenel(Rav)-Unique(Uni)-Missense(Mis)-Putative Function Associated(Fun)-Present In Correctly Assembled Region Of Genome(Cor)-Identifiable In Annotated Genome InP ATRIC(PAT)-9SNPs
CHR	POS	Gene Name	Gene Identifier	RavenelSNPoutput	REF-AF2122-97	Cattle-10-7428	Deer-95-1315	EVIDENCE (Frequency count of Ravenel vs Af2122)	FTYPE	STRAND	NT_POS	AA_POS	EFFECT	PATRIC Calssification	Mycobrowser classification in MBO	Mycobrowser classification in MTB	PRODUCT
LT708304	4305161	mycp1	MB3913C	A	G	G	G	A:432 G:0	CDS	-	374/1341	125/446	missense_variant c.374C>T p.Thr125Ile	Intracellular survival and replication	Intermediary metabolism and respiration	Intermediary metabolism and respiration	membrane-anchored mycosin mycp1 (serine protease) (subtilisin-like protease) (subtilase-like) (mycosin-1)
LT708304	4283808	esph	MB3897	A	G	G	G	A:463 G:0	CDS	+	307/552	103/183	missense_variant c.307G>A p.Ala103Thr	Virulence	Cell wall and cell processes	Cell wall and cell processes	esx-1 secretion-associated protein esph
LT708304	4229553	mmpL8	MB3853C	T	C	C	C	T:363 C:0	CDS	-	2662/3270	888/1089	missense_variant c.2662G>A p.Val888Ile	Virulence	Cell wall and cell processes	Cell wall and cell processes	conserved integral membrane transport protein mmpl8
LT708304	4208072	aftb	MB3835C	A	G	G	G	A:433 G:1	CDS	-	1450/1884	484/627	missense_variant c.1450C>T p.His484Tyr	none	Cell wall and cell processes	Cell wall and cell processes	possible arabinofuranosyltransferase aftb
LT708304	2015643	eccc5	MB1812	T	C	C	C	T:380 C:0	CDS	+	1520/4176	507/1391	missense_variant c.1520C>T p.Thr507Met	Type VII secretion	0	Cell wall and cell processes	esx conserved component eccc5. esx-5 type vii secretion system protein.
LT708304	1129357	rpfB	MB1036	G	A	A	A	G:403 A:0	CDS	+	788/1089	263/362	missense_variant c.788A>G p.Glu263Gly	Virulence	Cell wall and cell processes	Cell wall and cell processes	Probable resuscitation-promoting factor rpfB
LT708304	1715469	pks5	MB1554C	T	C	C	C	T:407 C:1	CDS	-	1363/6327	455/2108	missense_variant c.1363G>A p.Gly455Ser	Virulence	0	Lipid metabolism	Probable polyketide synthase pks5
LT708304	3262864	fadD29	MB2974C	C	T	T	T	C:372 T:1	CDS	-	692/1860	231/619	missense_variant c.692A>G p.Asn231Ser	Virulence	Lipid metabolism	Lipid metabolism	fatty-acid-amp ligase fadd29 (fatty-acid-amp synthetase) (fatty-acid-amp synthase)
LT708304	3929690	fadE29	MB3573C	C	A	A	A	C:422 A:0	CDS	-	1079/1164	360/387	missense_variant c.1079T>G p.Val360Gly	Cellular metabolism	Lipid metabolism	Lipid metabolism	PROBABLE ACYL-COA DEHYDROGENASE FADE29

## Sheet: S3-RavenelGapsBetweenContigs
LT708304.1 gap #	Start	End	Length of gap (bp)		LT708304.1 gap #	Start	End	Length of gap (bp)
1	103846	105077	1232		23	2916356	2917009	654
2	179424	179512	89		24	3094151	3094332	182
3	334098	334356	259		25	3097047	3097228	182
4	339740	340055	316		26	3338043	3338208	166
5	927694	927849	156		27	3340424	3340589	166
6	1094238	1094982	745		28	3341149	3341558	410
7	1095933	1096033	101		29	3342373	3342810	438
8	1096424	1097022	599		30	3488285	3488610	326
9	1161429	1161538	110		31	3490431	3490756	326
10	1219147	1219392	246		32	3692164	3692469	306
11	1340717	1341007	291		33	3693892	3694197	306
12	1342660	1343096	437		34	3710698	3711276	579
13	1535697	1535979	283		35	3737455	3737559	105
14	2020258	2020625	368		36	3777143	3777490	348
15	2158494	2158696	203		37	3845260	3845557	298
16	2158982	2159089	108		38	3878194	3878342	149
17	2608993	2609424	432		39	3882156	3884098	1943
18	2611572	2612006	435		40	3889202	3890564	1363
19	2767267	2776464	9198		41	3894307	3894628	322
20	2799791	2800227	437		42	3894987	3896896	1910
21	2838180	2838325	146		43	4000624	4000956	333
22	2838836	2838981	146
